# Supplementary material for: Fabrication and photoelectrochemical properties of silicon/nickel oxide core/shell nanowire arrays
Source: Royal Society of Chemistry journal article supplement (doi:10.1039/c5ra13857d), 2015-01-01
Supplement: c5ra13857d1.pdf [file c5ra13857d1.pdf]

**Supporting Information for**  
**Fabrication and Photoelectrochemical Property of Silicon/Nickel**  
**Oxide Core/shell Nanowire Arrays**

Fu-Qiang Zhang,<sup>a</sup> Ya Hu,<sup>a</sup> Xiang-Min Meng,<sup>b</sup> and Kui-Qing Peng<sup>a</sup>

<sup>a</sup> *Department of Physics and Beijing Key Laboratory of Energy Conversion and Storage Materials, Beijing*

*Normal University, Beijing, 100875, China*

<sup>b</sup> *Technical Institute of Physics and Chemistry and Key Laboratory of Photochemical Conversion and*

*Optoelectronic Materials, Chinese Academy of Sciences, Beijing, 100190, China*

*\*E-mail: kq\_peng@bnu.edu.cn*

**Contents**

**Fig. S1** Schematic Diagram of the Silicon/NiO<sub>x</sub> Core/Shell Nanowire Array Fabrication Procedure: (a) Silicon Nanowire Arrays. (b) By displacement reaction to form Silicon/Nickel Core/shell nanowire array. (c) By thermal oxidation to form Silicon/Nickel Oxide core/shell Nanowire Array.

**Fig. S2** TEM images of silicon/NiO<sub>x</sub> core/shell nanowire array fabricated by 2 min displacement reaction and thermal oxidation.

**Fig. S3** Digital photo of silicon/NiO<sub>x</sub> core/shell nanowire wafer which fabricated by 2 min and 5 min displacement reaction, respectively. The photo is taken under incandescent.

**Fig. S4** Selected area electron diffraction (SAED) of the nanoparticles on the nanowire.

**Fig. S5** (a) Typical GC trace of the evolved gas. (b) Digital image of the oxygen bubbles during the test.

**Fig. S6** Cross section SEM image of silicon/NiO<sub>x</sub> core/shell nanowire photoanode after 48 h stability test.

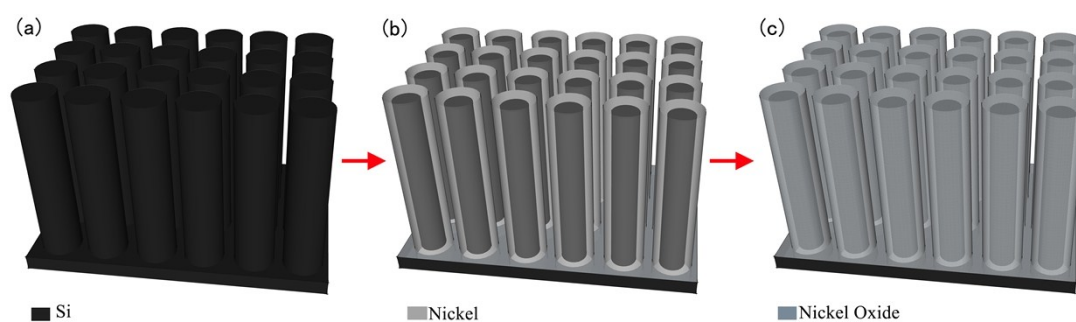

**Fig. S1** Schematic Diagram of the Silicon/ $\text{NiO}_x$  Core/Shell Nanowire Array Fabrication Procedure: (a) Silicon Nanowire Arrays. (b) By displacement reaction to form Silicon/Nickel Core/shell nanowire array. (c) By thermal oxidation to form Silicon/Nickel Oxide core/shell Nanowire Array.

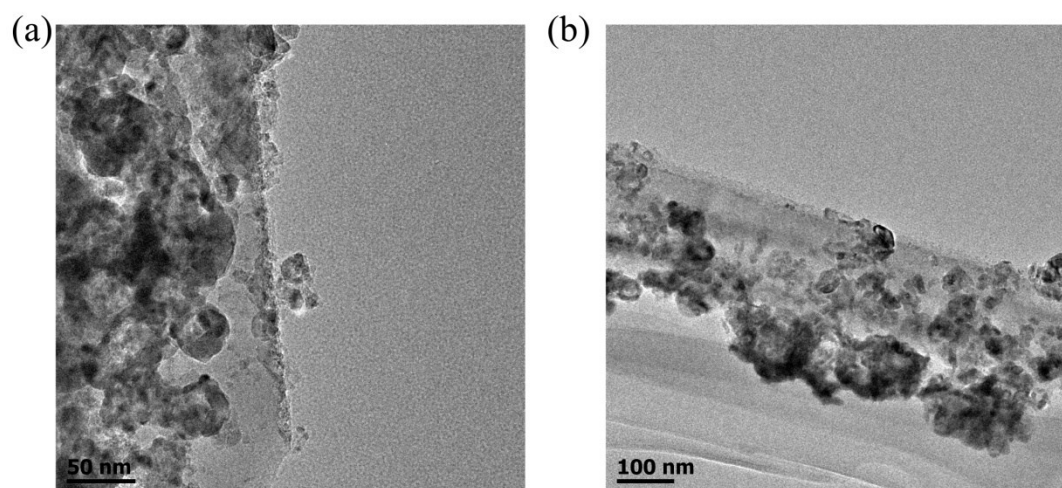

**Fig. S2** TEM images of silicon/ $\text{NiO}_x$  core/shell nanowire array fabricated by 2 min displacement reaction and thermal oxidation.

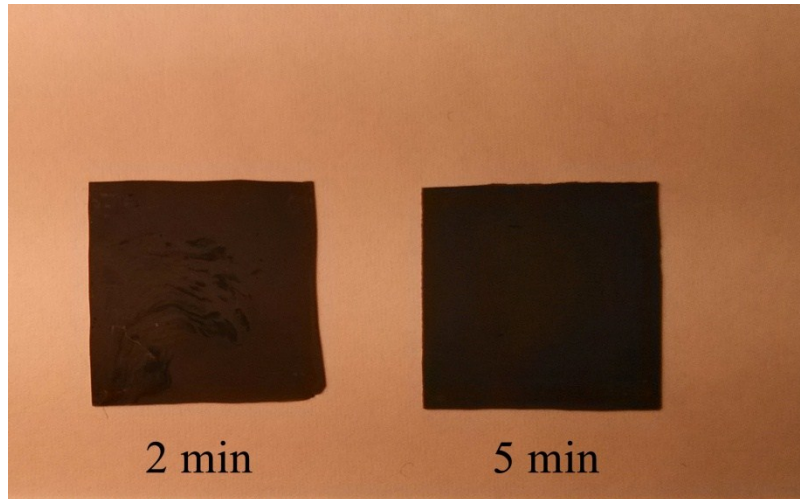

**Fig. S3** Digital photo of silicon/NiO<sub>x</sub> core/shell nanowire wafer which fabricated by 2 min and 5 min displacement reaction, respectively. The photo is taken under incandescent.

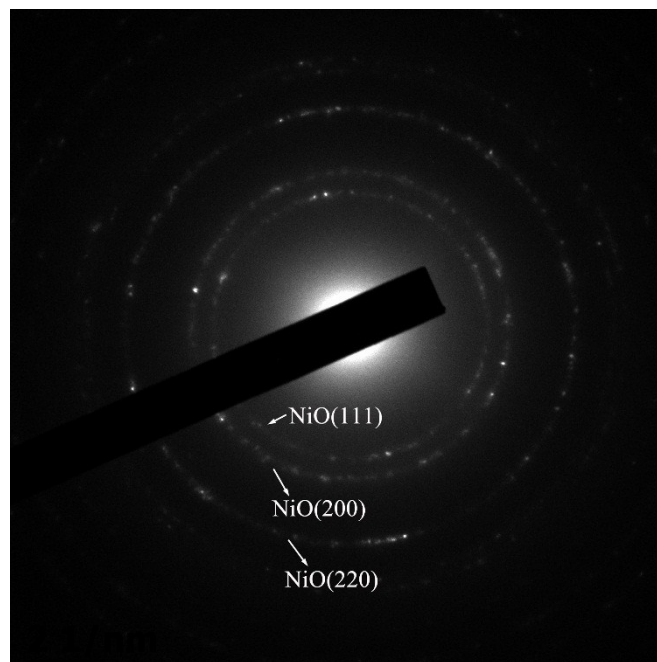

**Fig. S4** Selected area electron diffraction (SAED) of the nanoparticles on the nanowire.

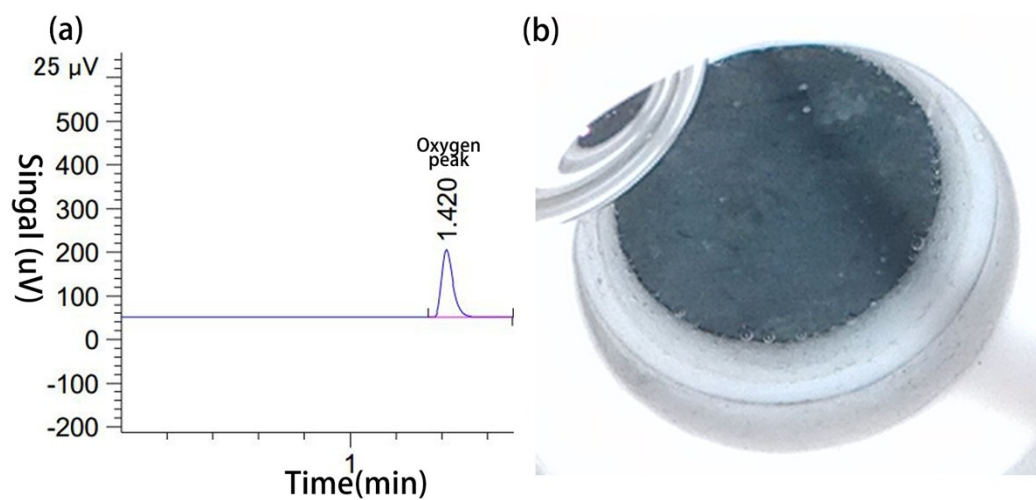

**Fig. S5** (a) Typical GC trace of the evolved gas. (b) Digital image of the oxygen bubbles during the test.

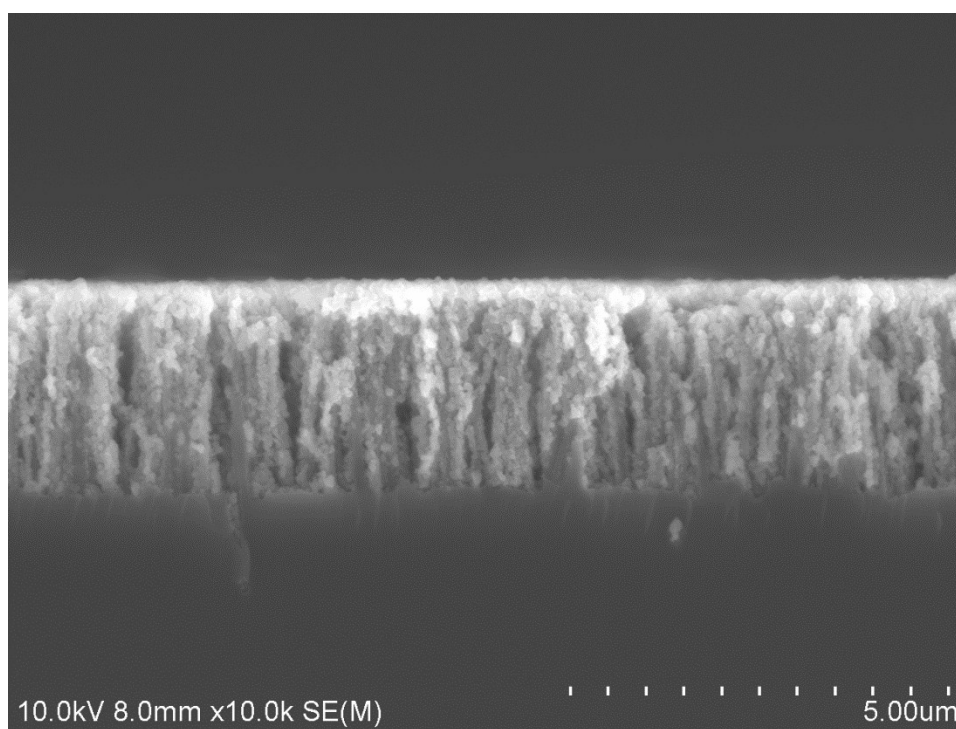

**Fig. S6** Cross section SEM image of silicon/NiO<sub>x</sub> core/shell nanowire photoanode after 48 h stability test.
